# Supplementary material for: Inhibition of Pseudomonas aeruginosa quorum sensing by methyl gallate from Mangifera indica
Source: Springer Nature journal article supplement (doi:10.1038/s41598-023-44063-0), 2023-10-20
Supplement: MOESM1 [file 41598_2023_44063_MOESM1_ESM.pdf]

# **Inhibition of *Pseudomonas aeruginosa* Quorum Sensing by a Methyl Gallate Compound from *Mangifera indica***

**Nourhan G. Naga<sup>1</sup>, Ahmed A. Zaki <sup>2</sup>, Dalia E. El-Badan<sup>1</sup>, Heba S.**

**Rateb<sup>3</sup>, Khalid M. Ghanem<sup>1</sup>, Mona I. Shaaban<sup>4</sup>**

<sup>1</sup>Botany and Microbiology Department, Faculty of Science, Alexandria University, Egypt,

<sup>2</sup>Pharmacognosy Department, Faculty of Pharmacy, Mansoura University, Egypt.

<sup>3</sup>Department of Pharmaceutical and Medicinal Chemistry, Faculty of Pharmacy, Misr University for Science and Technology, Cairo, Egypt

<sup>4</sup>Microbiology and Immunology Department, Faculty of Pharmacy, Mansoura University, El Mansoura, Egypt

Corresponding author: Mona I. Shaaban

Phone: +201092535893; fax: (+2) 050-2246253

E-mail: [mona\\_ibrahem@mans.edu.eg](mailto:mona_ibrahem@mans.edu.eg), [sarafawzy2002@yahoo.com](mailto:sarafawzy2002@yahoo.com)

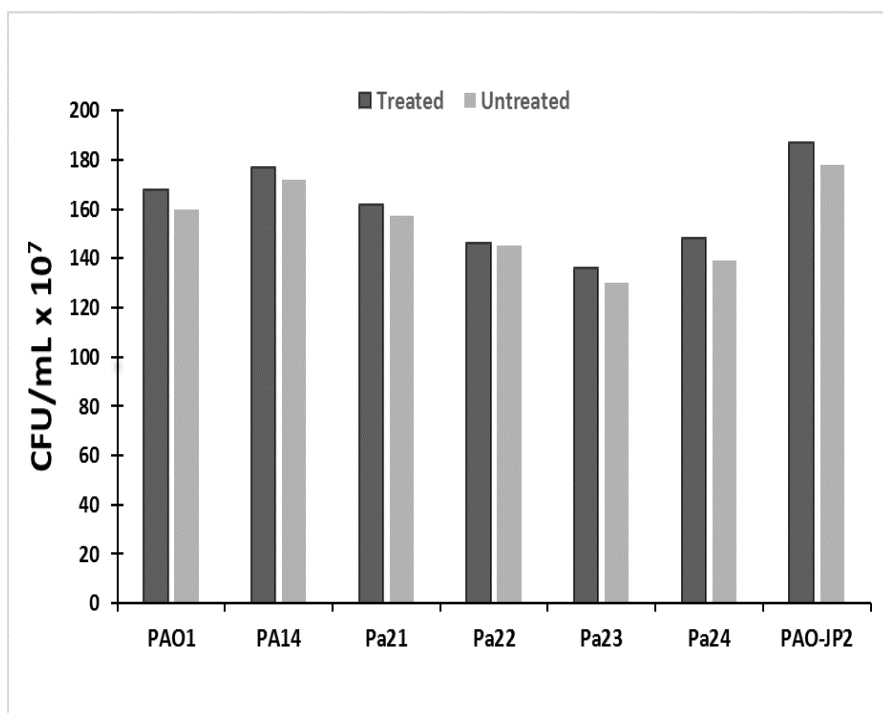

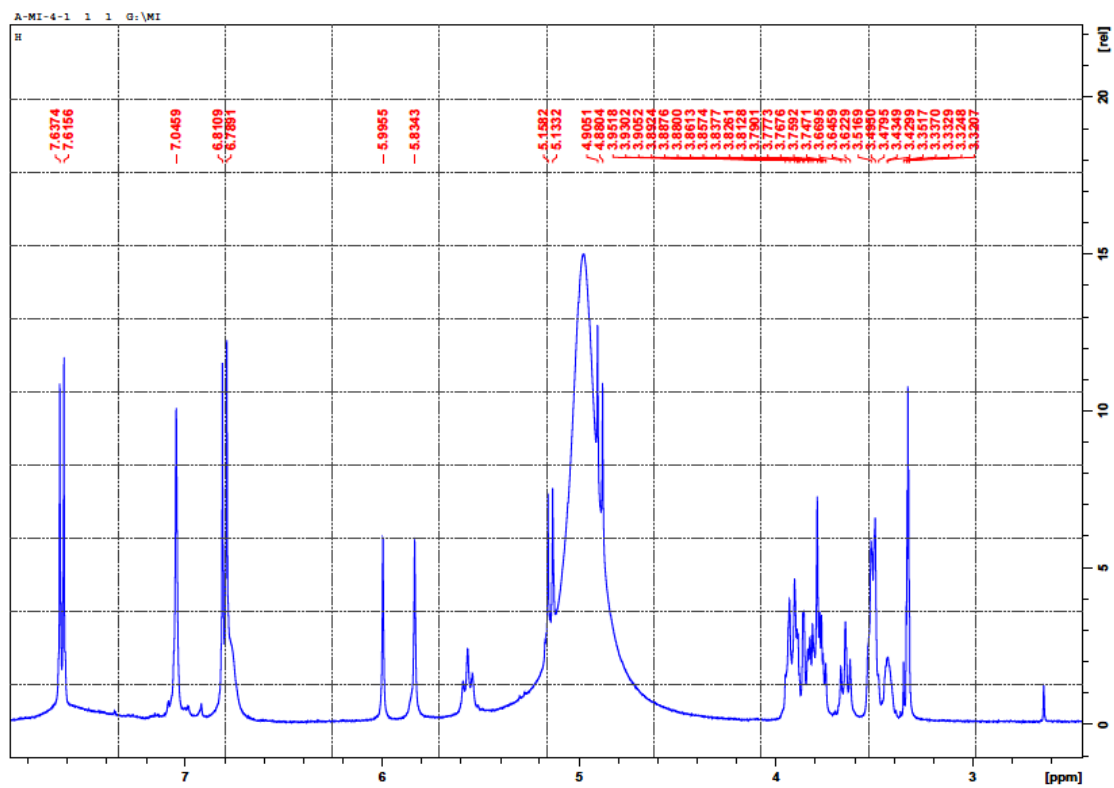

**Supplementary figure S1:**  $^1\text{H}$ -NMR Spectrum of Compound **4-1** (400 MHz,  $\text{CD}_3\text{OD}$ )

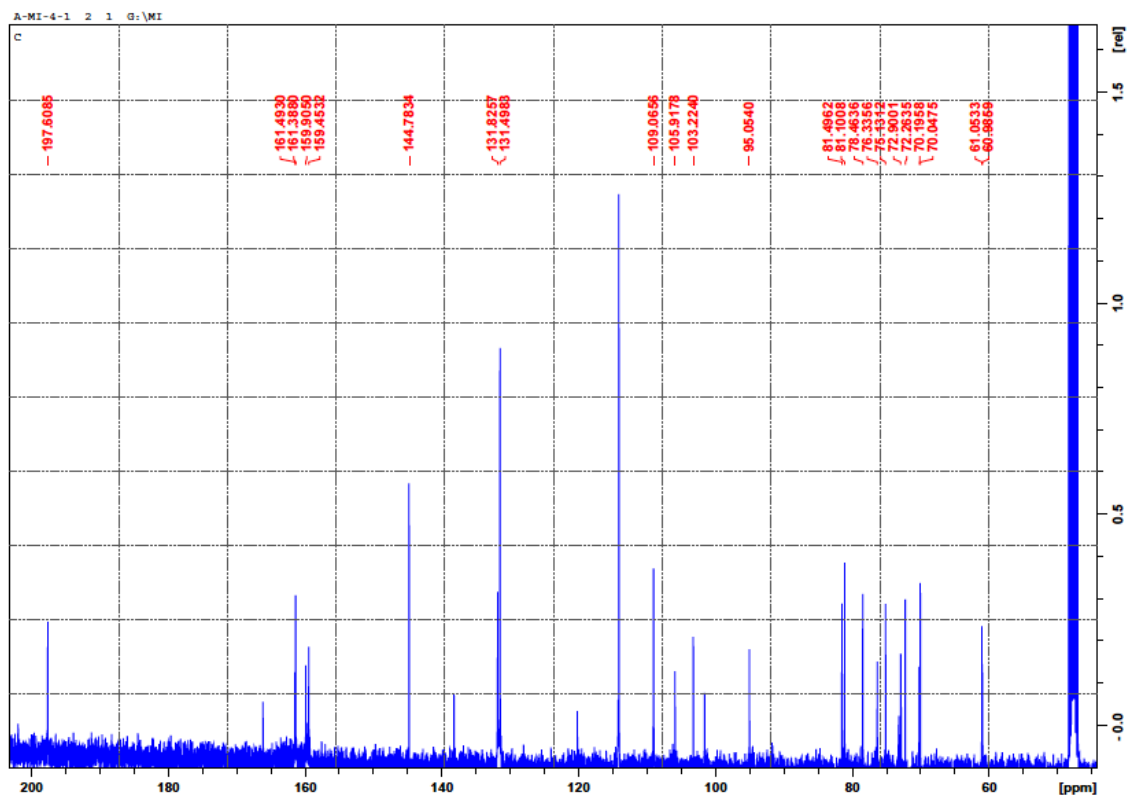

Supplementary figure S2:  $^{13}\text{C}$ -NMR Spectrum of Compound 4-1 (100 MHz,  $\text{CD}_3\text{OD}$ )

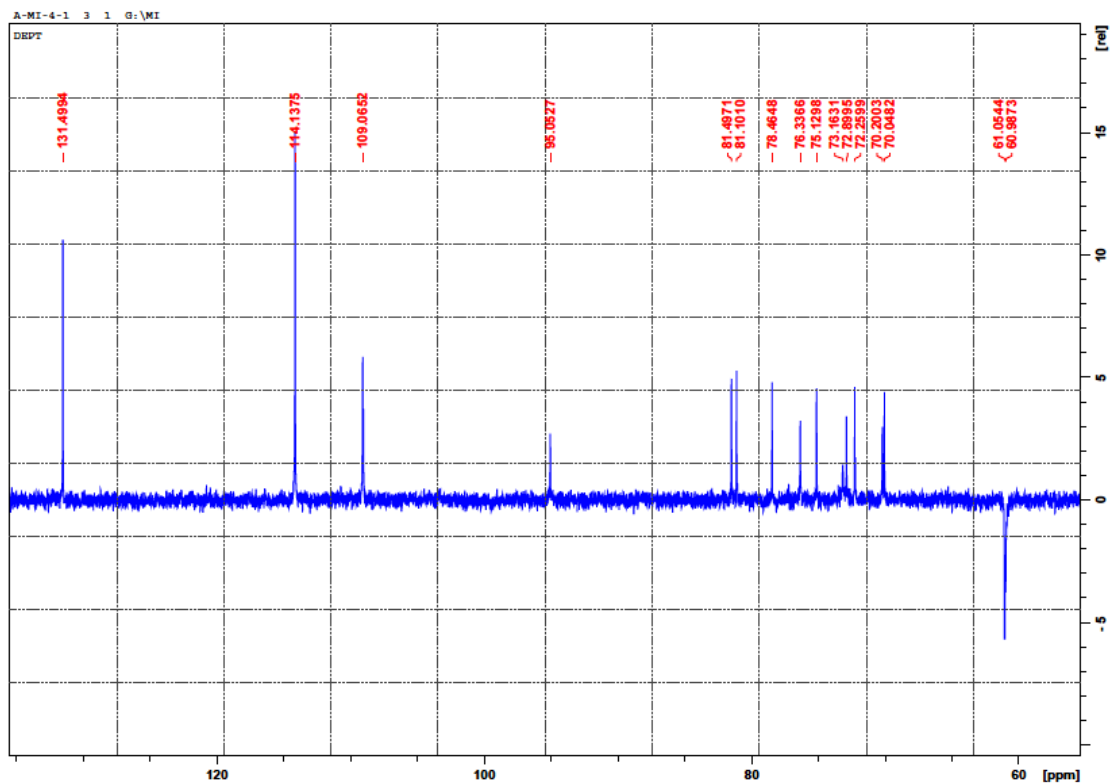

**Supplementary figure S3:** DEPT Spectrum of Compound **4-1** in CD<sub>3</sub>OD

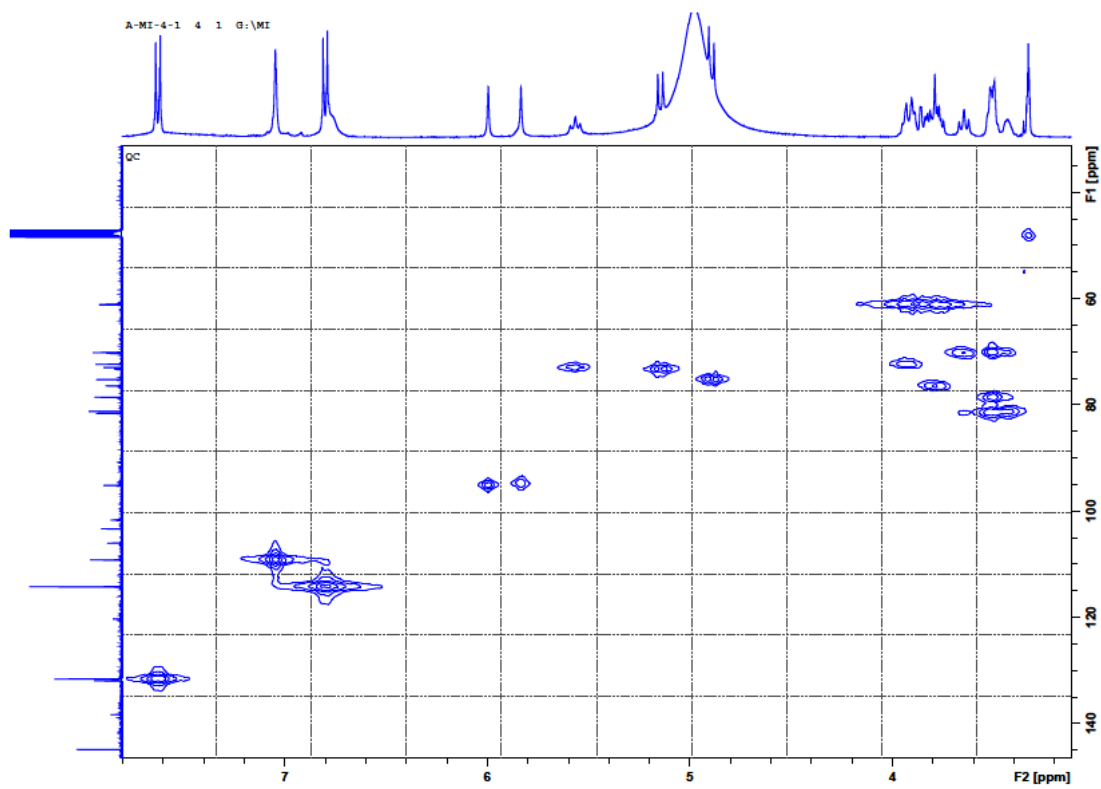

**Supplementary figure S4:** HMQC Spectrum of Compound **4-1** (400 MHz, CD<sub>3</sub>OD)

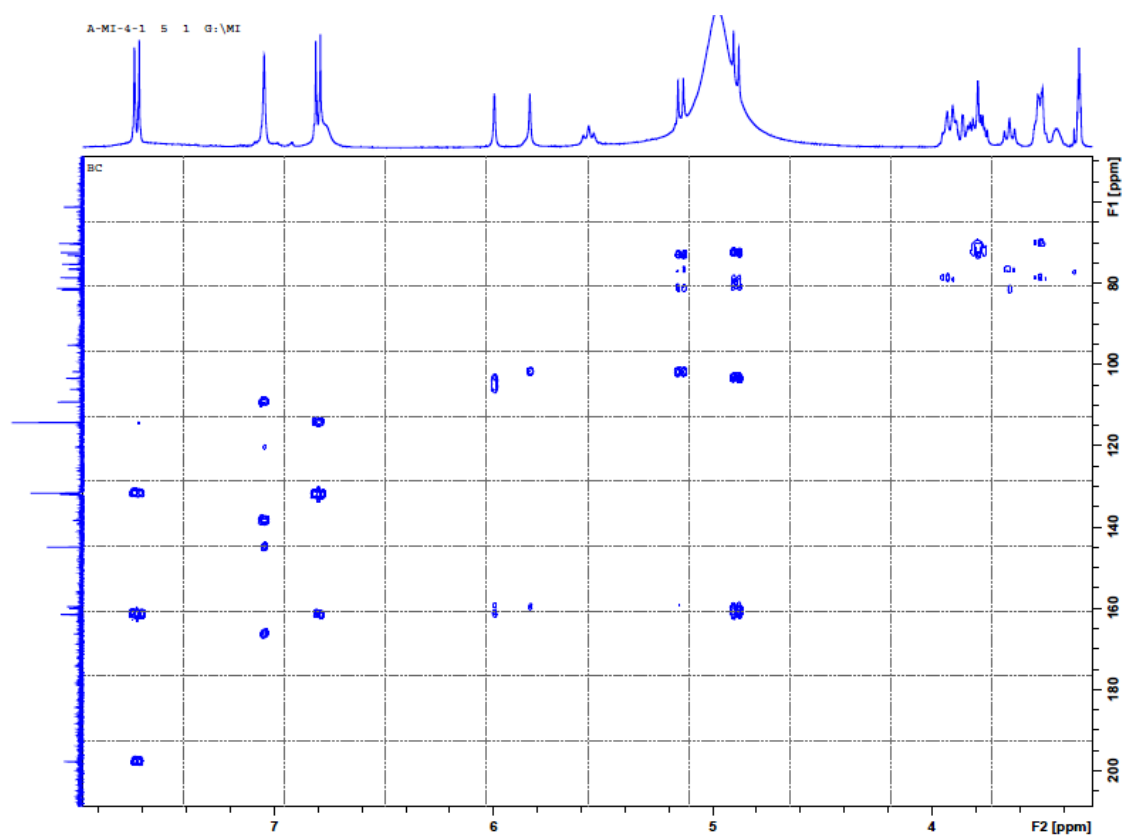

**Supplementary figure S5:** HMBC Spectrum of Compound **4-1** (400 MHz, CD<sub>3</sub>OD)

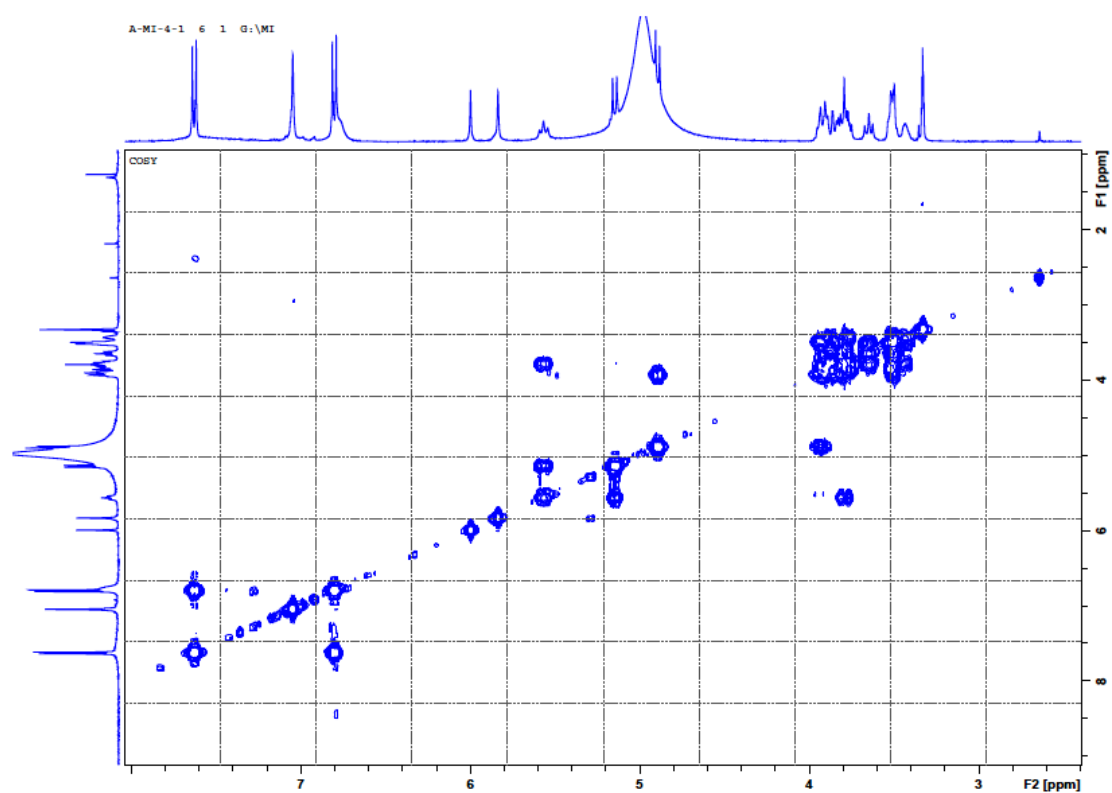

**Supplementary figure S6:** COSY Spectrum of Compound **4-1** (400 MHz, CD<sub>3</sub>OD)



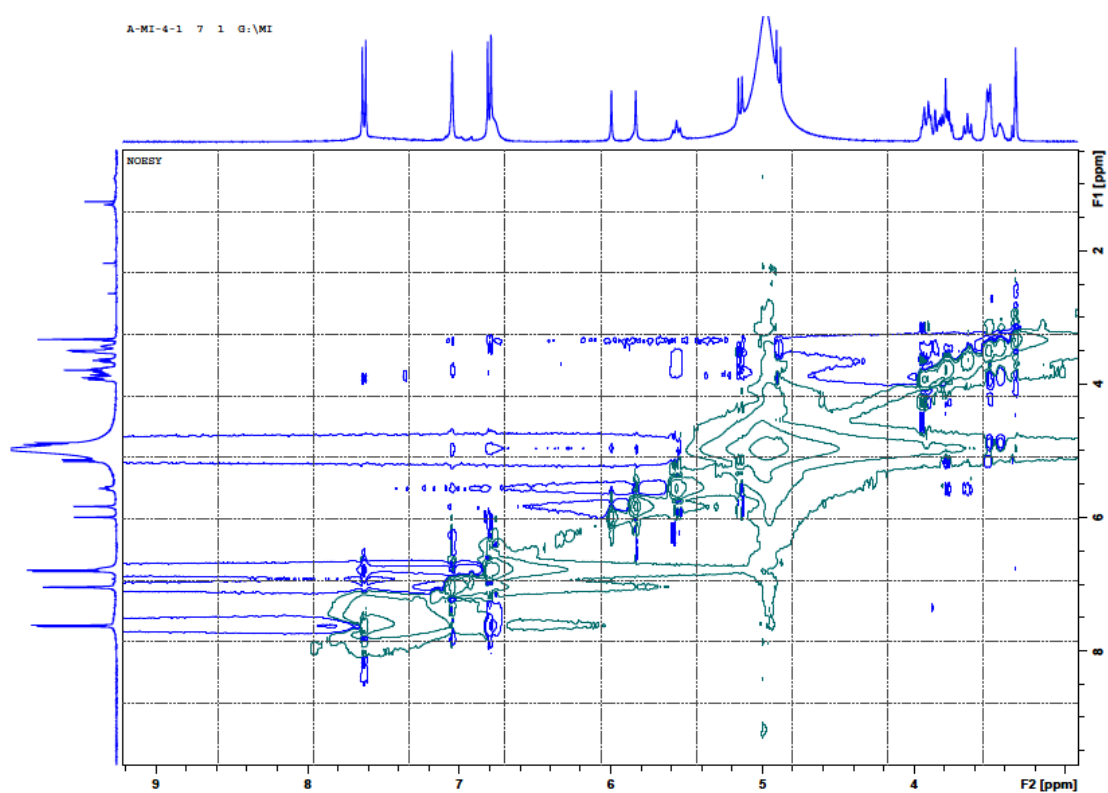

**Supplementary figure S7:** NOESY Spectrum of Compound **4-1** (400 MHz, CD<sub>3</sub>OD)

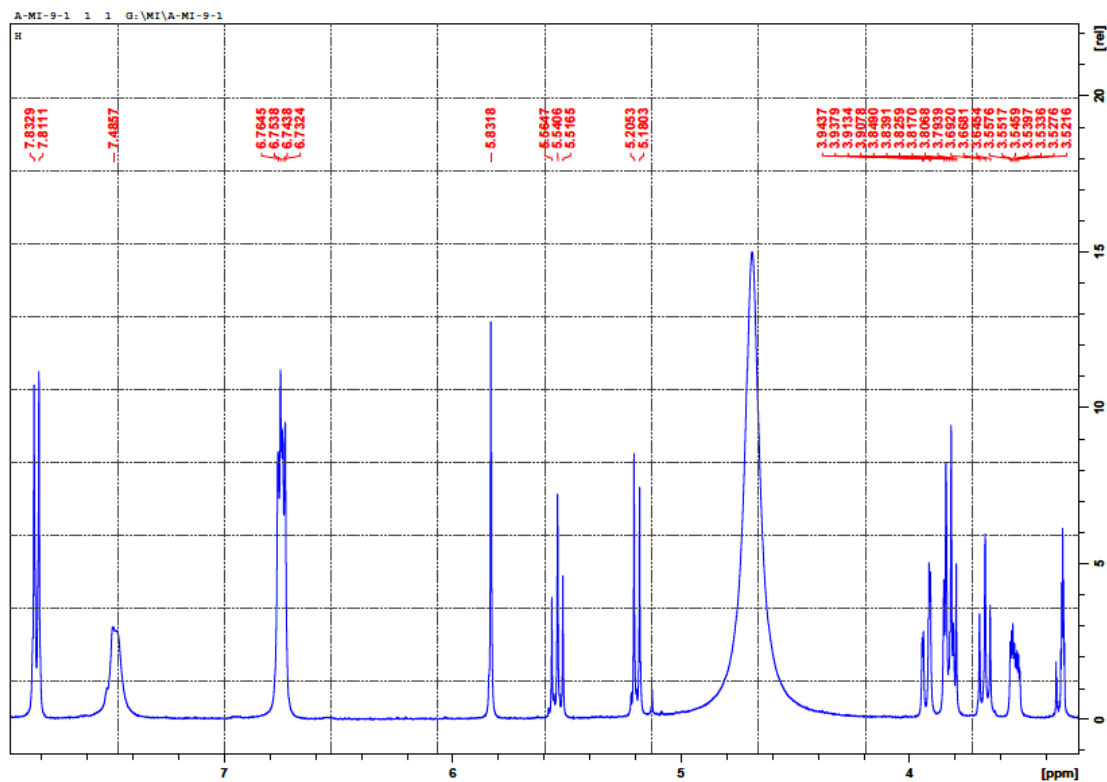

Supplementary figure S8:  $^1\text{H}$ -NMR Spectrum of Compound **9-1** (400 MHz,  $\text{CD}_3\text{OD}$ )

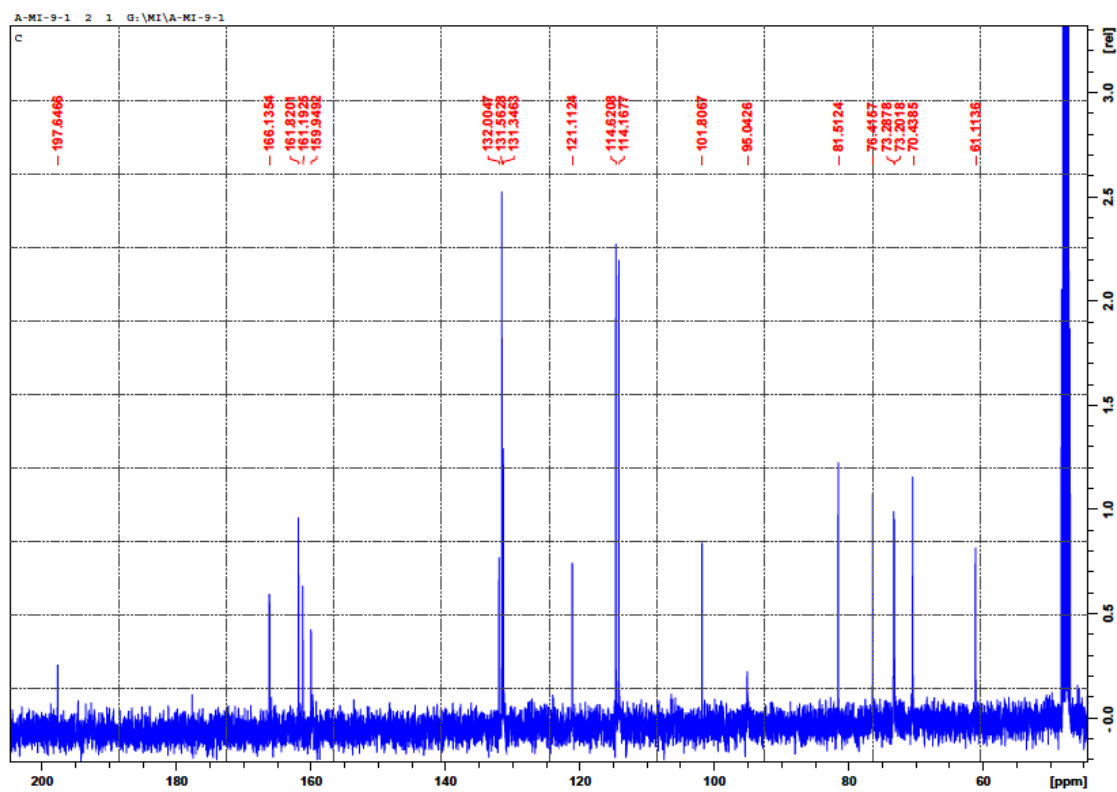

Supplementary figure S 9:  $^{13}\text{C}$ -NMR Spectrum of Compound **9-1** (100 MHz,  $\text{CD}_3\text{OD}$ )

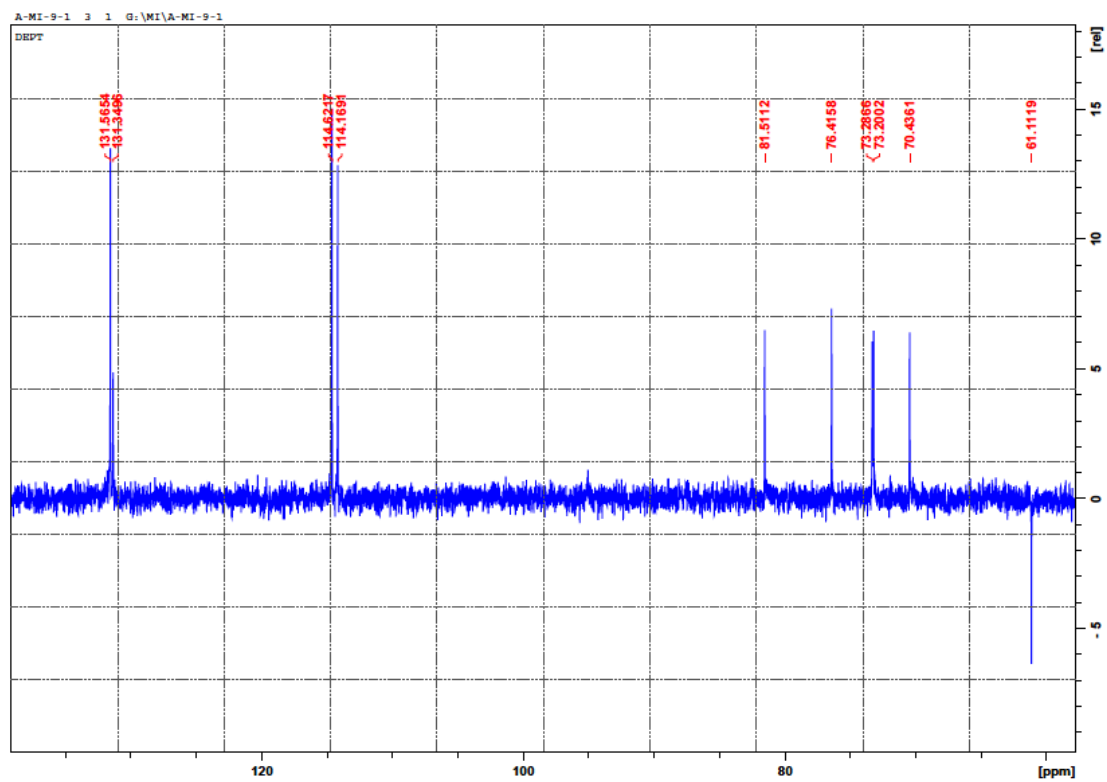

**Supplementary figure S10:** DEPT Spectrum of Compound **9-1** in CD<sub>3</sub>OD

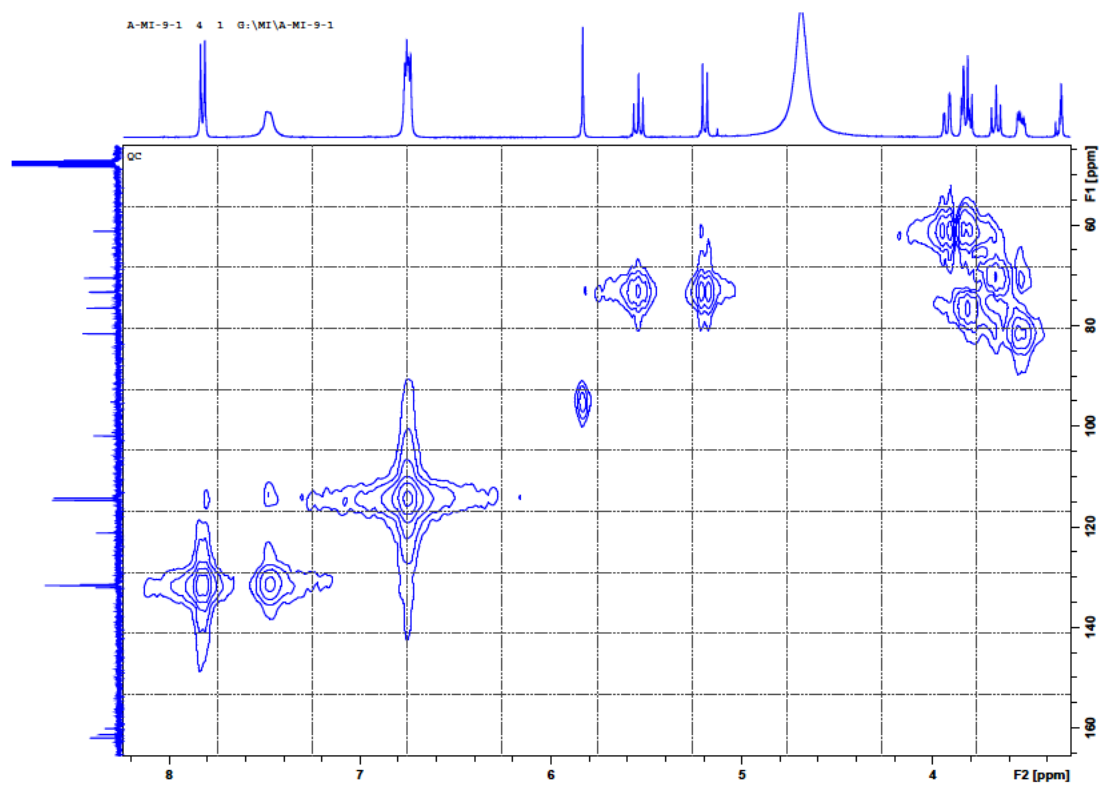

**Supplementary figure S11:** HMQC Spectrum of Compound **9-1** (400 MHz, CD<sub>3</sub>OD)

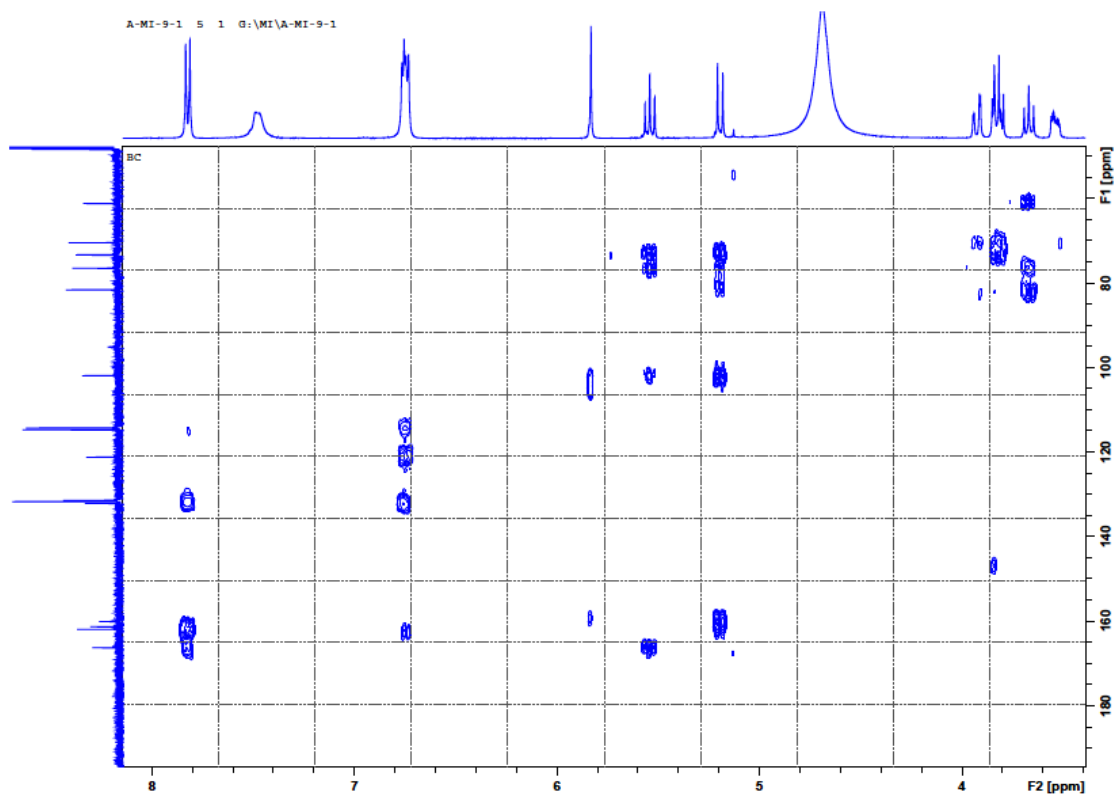

**Supplementary figure S12:** HMBC Spectrum of Compound **9-1** (400 MHz, CD<sub>3</sub>OD)

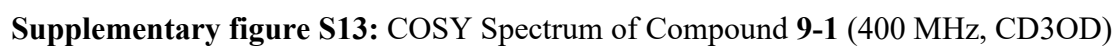

**Supplementary figure S13:** COSY Spectrum of Compound **9-1** (400 MHz, CD<sub>3</sub>OD)

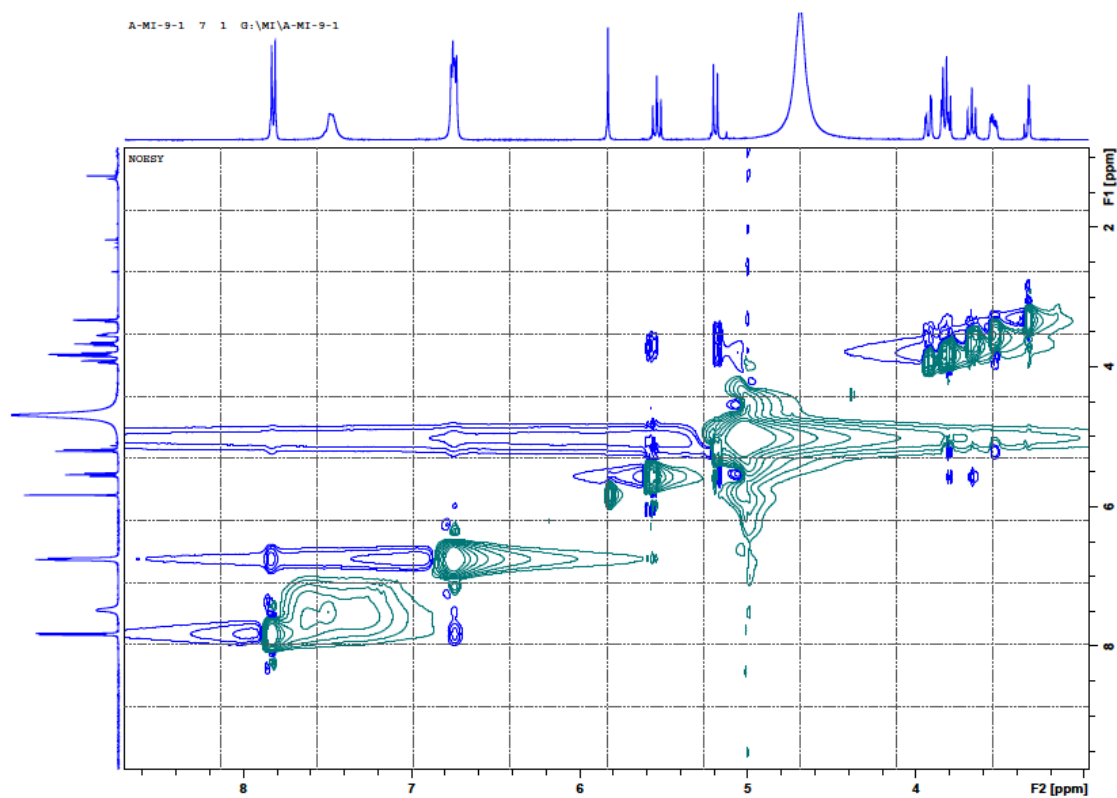

**Supplementary figure S14:** NOESY Spectrum of Compound **9-1** (400 MHz, CD<sub>3</sub>OD)



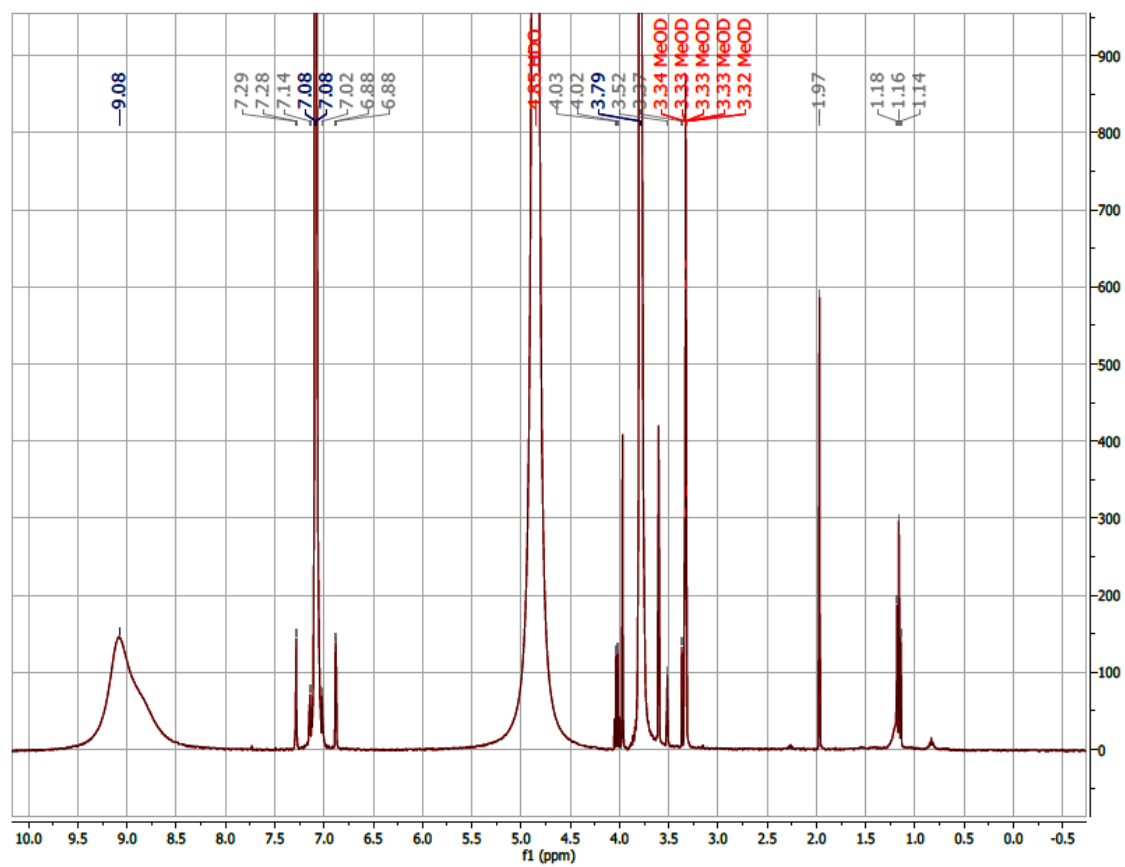

**Supplementary figure S15:**  $^1\text{H}$ -NMR Spectrum of Methyl gallate (400 MHz,  $\text{CD}_3\text{OD}$ )

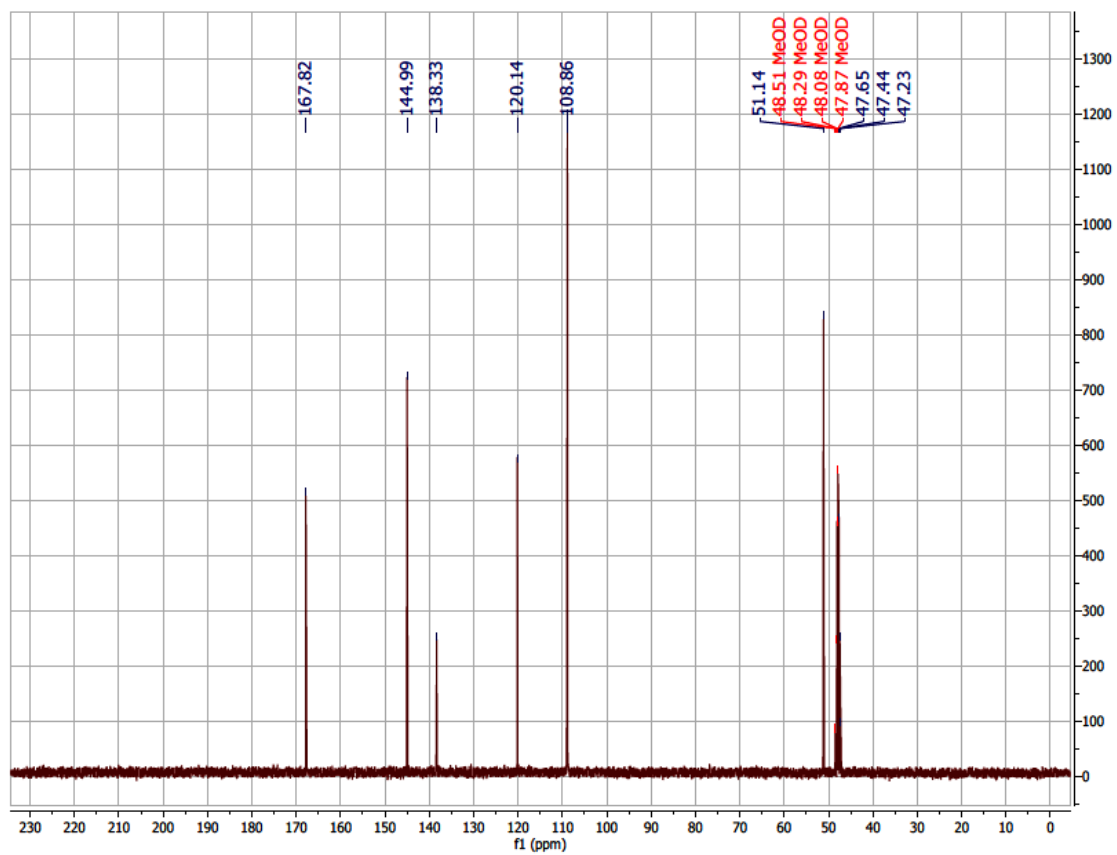

**Supplementary figure S16:**  $^{13}\text{C}$ -NMR Spectrum of Methyl gallate (100 MHz,  $\text{CD}_3\text{OD}$ )

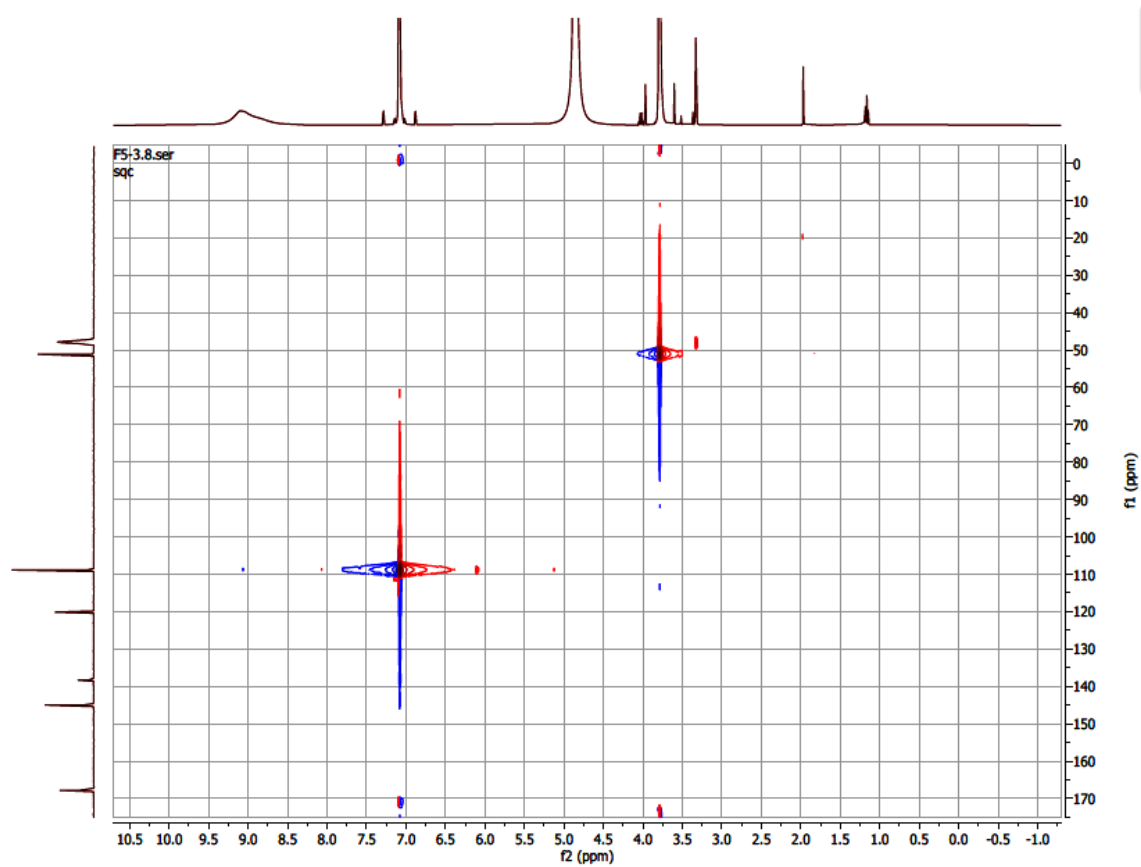

**Supplementary figure S17:** HMQC Spectrum of Methyl gallate (400 MHz, CD<sub>3</sub>OD)

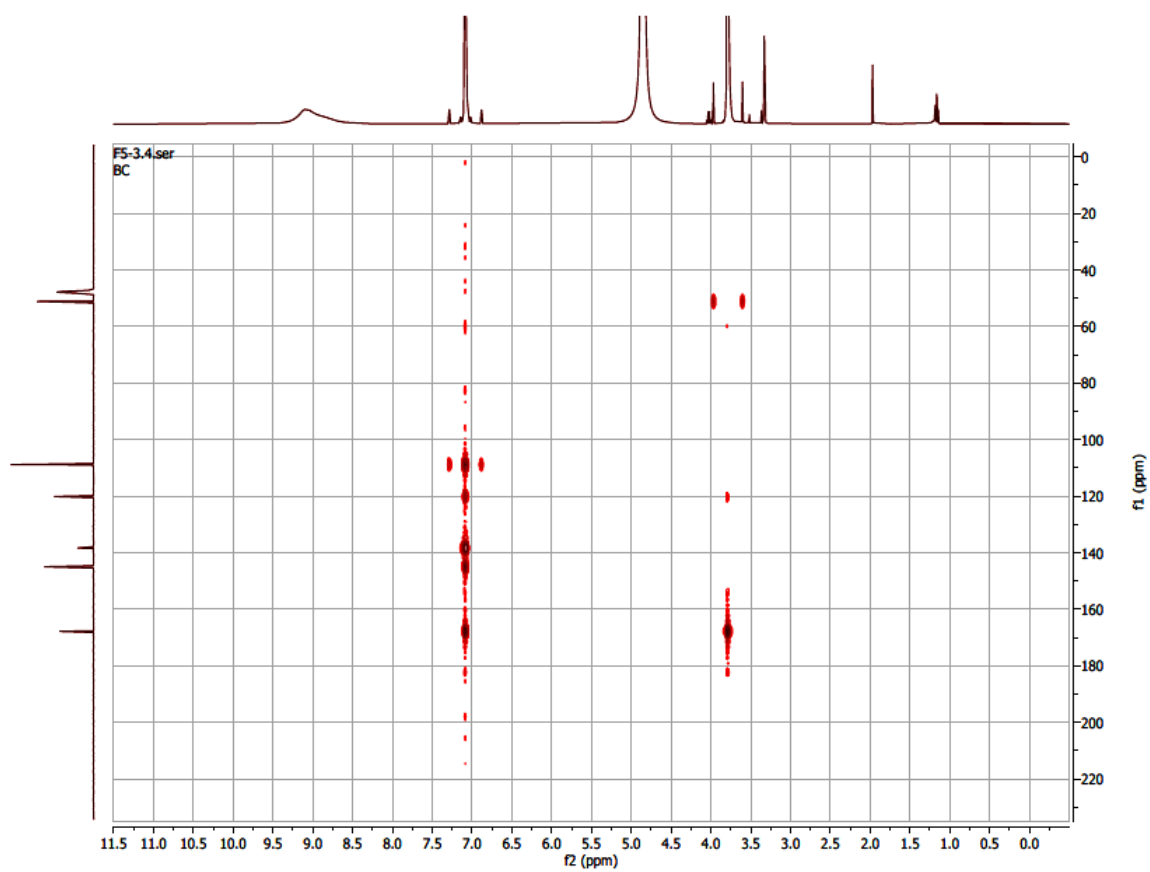

**Supplementary figure S18:** HMBC Spectrum of Methyl gallate (400 MHz, CD<sub>3</sub>OD)

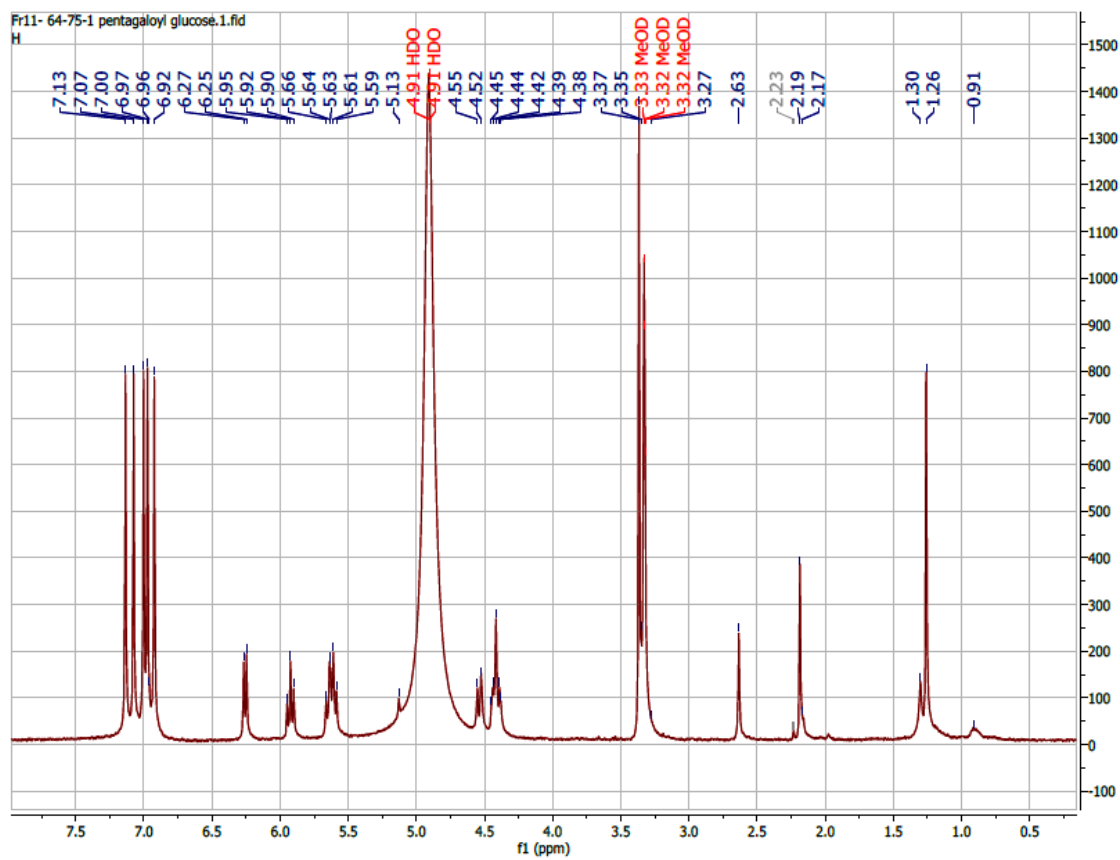

**Supplementary figure S19:**  $^1\text{H}$ -NMR Spectrum of pentagalloyl glucoside (400 MHz, CD<sub>3</sub>OD)

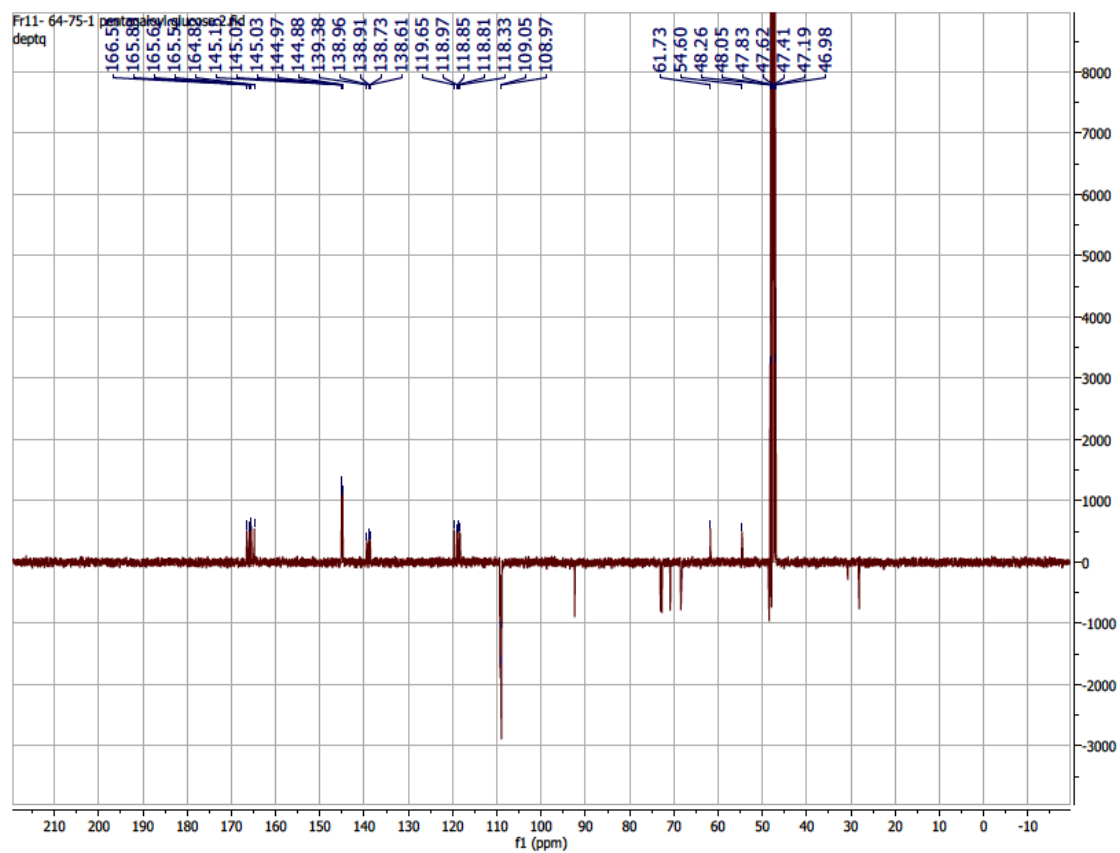

**Supplementary figure S20:**  $^{13}\text{C}$ -NMR Spectrum of pentagalloyl glucoside (100 MHz, CD<sub>3</sub>OD)

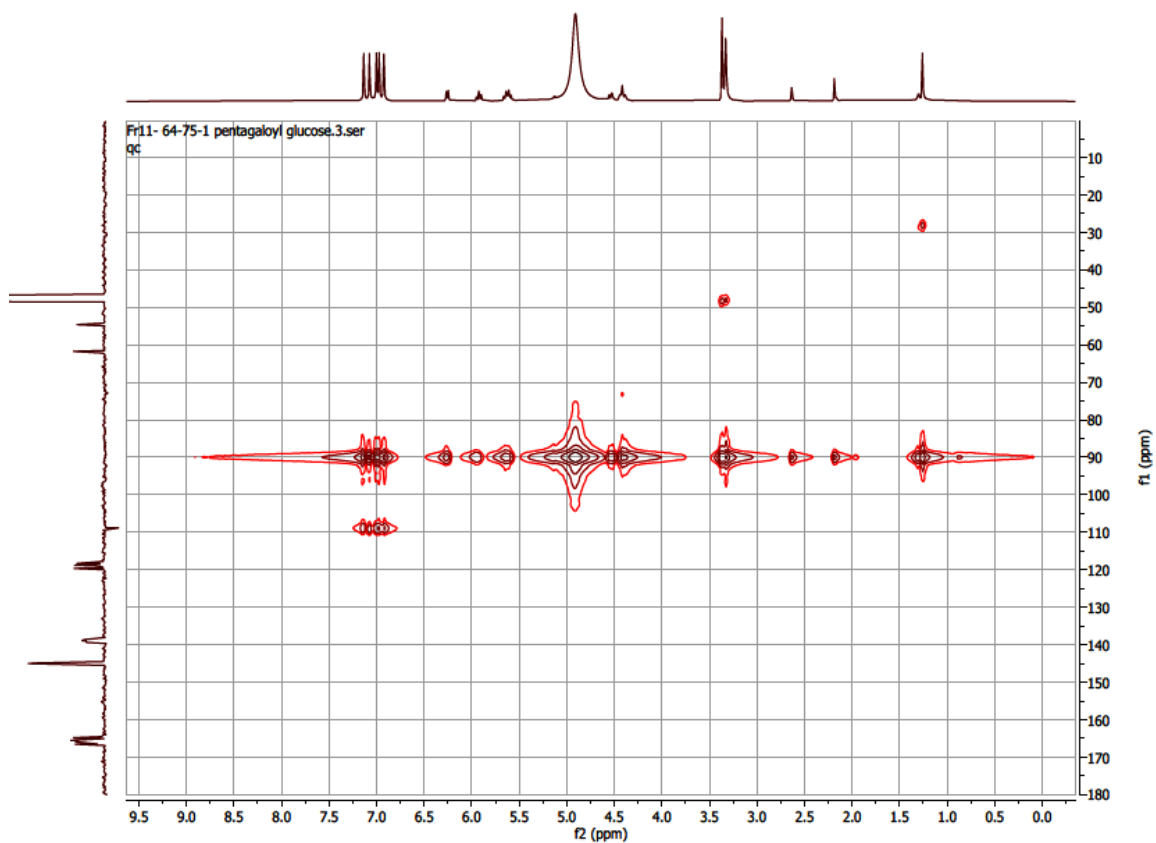

**Supplementary figure S21:** HMQC Spectrum of pentagalloyl glucoside (400 MHz, CD<sub>3</sub>OD)

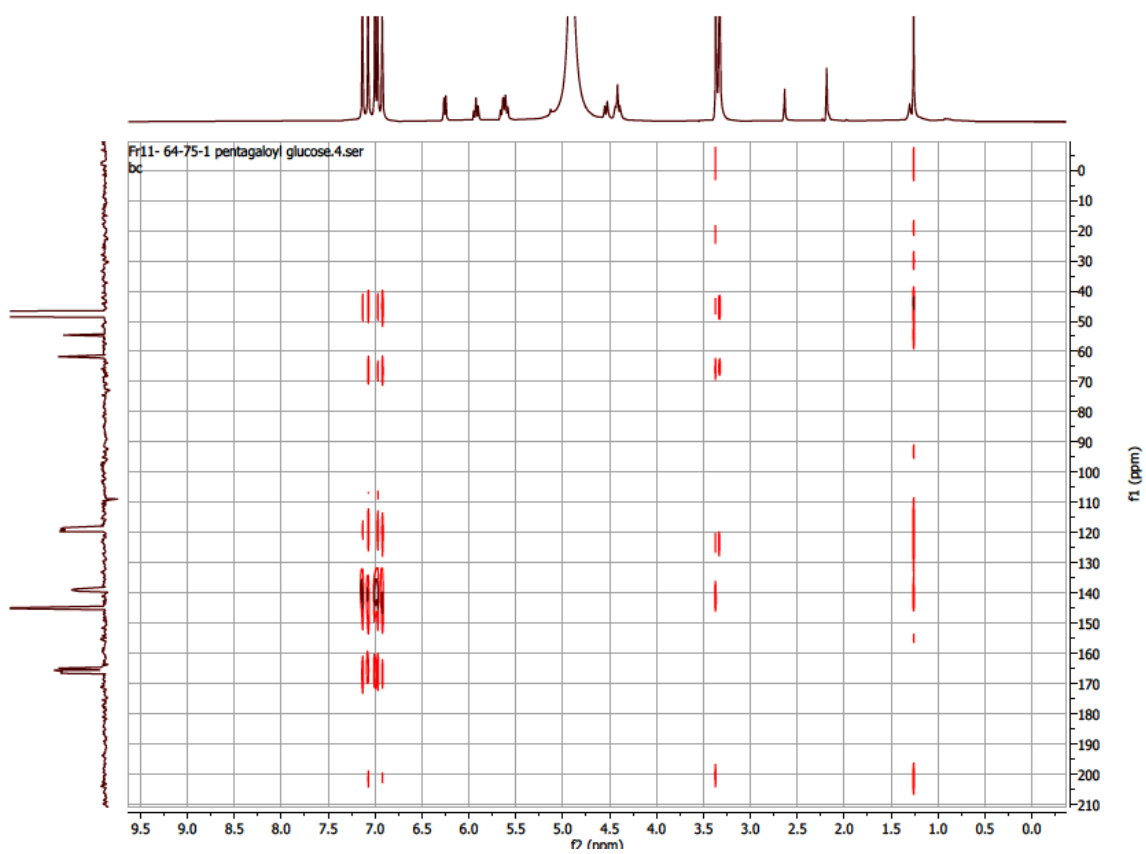

**Supplementary figure S22:**HMBC Spectrum of pentagalloyl glucoside (400 MHz, CD3OD)



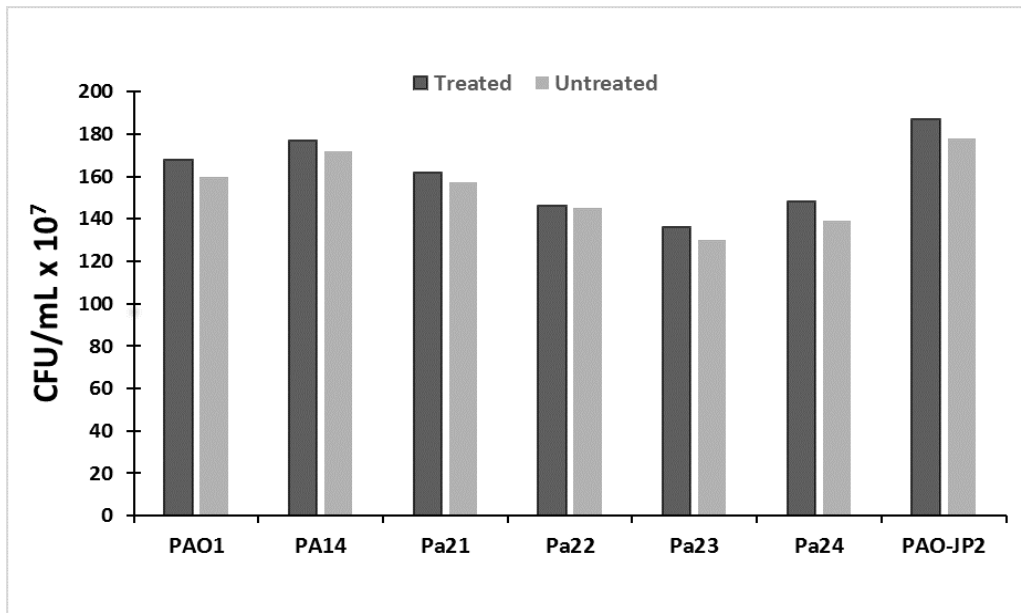

**Supplementary figure S23:** Bacterial count of *P. aeruginosa* with and without 1/2 MIC of methyl gallate.
